# Supplementary material for: Theoretical studies on the stability of phenylpentazole and its substituted derivatives of –OH, –OCH3, –OC2H5and –N(CH3)2
Source: Royal Society of Chemistry journal article supplement (doi:10.1039/c4ra10669e), 2014-10-21
Supplement: c4ra10669e1.pdf [file c4ra10669e1.pdf]

Table 1S Predicted BDE of path 1 and  $E_{a,1}$  of path 2 at the B3LYP/6-31G\* level

|      | Path 1   | Path 2    |
|------|----------|-----------|
|      | BDE      | $E_{a,1}$ |
|      | (kJ/mol) | (kJ/mol)  |
| A    | 487.544  | 392.922   |
| A11  | 493.958  | 396.708   |
| A12  | 495.112  | 401.572   |
| A13  | 495.567  | 401.857   |
| A14  | 502.968  | 407.116   |
| A11' | 486.316  | 381.659   |
| A12' | 488.105  | 372.095   |
| A13' | 488.473  | 373.145   |
| A14' | 492.081  | 378.038   |
| A21  | 486.372  | 376.708   |
| A22  | 488.471  | 378.752   |
| A23  | 489.200  | 379.705   |
| A24  | 496.031  | 385.754   |
| A25  | 491.215  | 373.569   |
| A26  | 497.776  | 380.615   |
| A31  | 491.634  | 376.541   |
| A32  | 488.839  | 374.316   |
| A33  | 491.796  | 378.151   |
| A34  | 495.338  | 385.786   |
| A35  | 492.267  | 377.850   |
| A36  | 488.863  | 374.976   |

Table 2S Predicted  $E_{a,2}$ \* at the B3LYP/6-31G\* level

|                         | n=1    | n=2    | n=3    | n=4    | n=5    | n=6    |
|-------------------------|--------|--------|--------|--------|--------|--------|
| A1n $E_{a,2}$ (kJ/mol)  | 92.394 | 92.821 | 92.801 | 94.610 |        |        |
| $Q_t$ (e)               | -0.490 | -0.491 | -0.495 | -0.515 |        |        |
| A1n' $E_{a,2}$ (kJ/mol) | 89.952 | 91.591 | 91.747 | 93.044 |        |        |
| $Q_t$ (e)               | -0.470 | -0.477 | -0.478 | -0.487 |        |        |
| A2n $E_a$ (kJ/mol)      | 90.191 | 92.303 | 92.500 | 94.655 | 92.608 | 94.594 |
| $Q_t$ (e)               | -0.475 | -0.484 | -0.485 | -0.503 | -0.489 | -0.508 |
| A3n $E_a$ (kJ/mol)      | 92.611 | 92.089 | 92.927 | 94.834 | 93.908 | 91.578 |
| $Q_t$ (e)               | -0.492 | -0.491 | -0.495 | -0.514 | -0.503 | -0.485 |

\*  $E_{a,2}$  and  $Q_t$  of A are 90.466 and -0.470 e, respectively.

Table 3S Predicted  $E_{\text{HOMO}}$ ,  $E_{\text{LUMO}}$  and  $E_{\text{g}}$  at the B3LYP/6-31G\* level \*

|      |                   | n=1   | n=2   | n=3   | n=4   | n=5   | n=6   |
|------|-------------------|-------|-------|-------|-------|-------|-------|
| A1n  | $E_{\text{HOMO}}$ | -6.69 | -6.56 | -6.52 | -5.69 |       |       |
|      | $E_{\text{LUMO}}$ | -1.87 | -1.82 | -1.79 | -1.54 |       |       |
|      | $E_{\text{g}}$    | 4.82  | 4.74  | 4.72  | 4.15  |       |       |
| A1n' | $E_{\text{HOMO}}$ | -6.81 | -6.65 | -6.60 | -5.71 |       |       |
|      | $E_{\text{LUMO}}$ | -2.04 | -2.02 | -1.99 | -1.77 |       |       |
|      | $E_{\text{g}}$    | 4.77  | 4.63  | 4.61  | 3.93  |       |       |
| A2n  | $E_{\text{HOMO}}$ | -6.65 | -6.56 | -6.48 | -5.32 | -6.51 | -5.63 |
|      | $E_{\text{LUMO}}$ | -2.05 | -1.98 | -1.93 | -1.54 | -1.97 | -1.69 |
|      | $E_{\text{g}}$    | 4.60  | 4.58  | 4.56  | 3.78  | 4.54  | 3.94  |
| A3n  | $E_{\text{HOMO}}$ | -6.33 | -6.48 | -6.29 | -5.26 | -5.58 | -6.39 |
|      | $E_{\text{LUMO}}$ | -1.88 | -1.92 | -1.79 | -1.60 | -1.78 | -1.89 |
|      | $E_{\text{g}}$    | 4.45  | 4.56  | 4.50  | 3.67  | 3.80  | 4.50  |

\* $E_{\text{HOMO}}$ ,  $E_{\text{LUMO}}$  and  $E_{\text{g}}$  of A are -7.36, -2.07 and 5.29 eV, respectively.

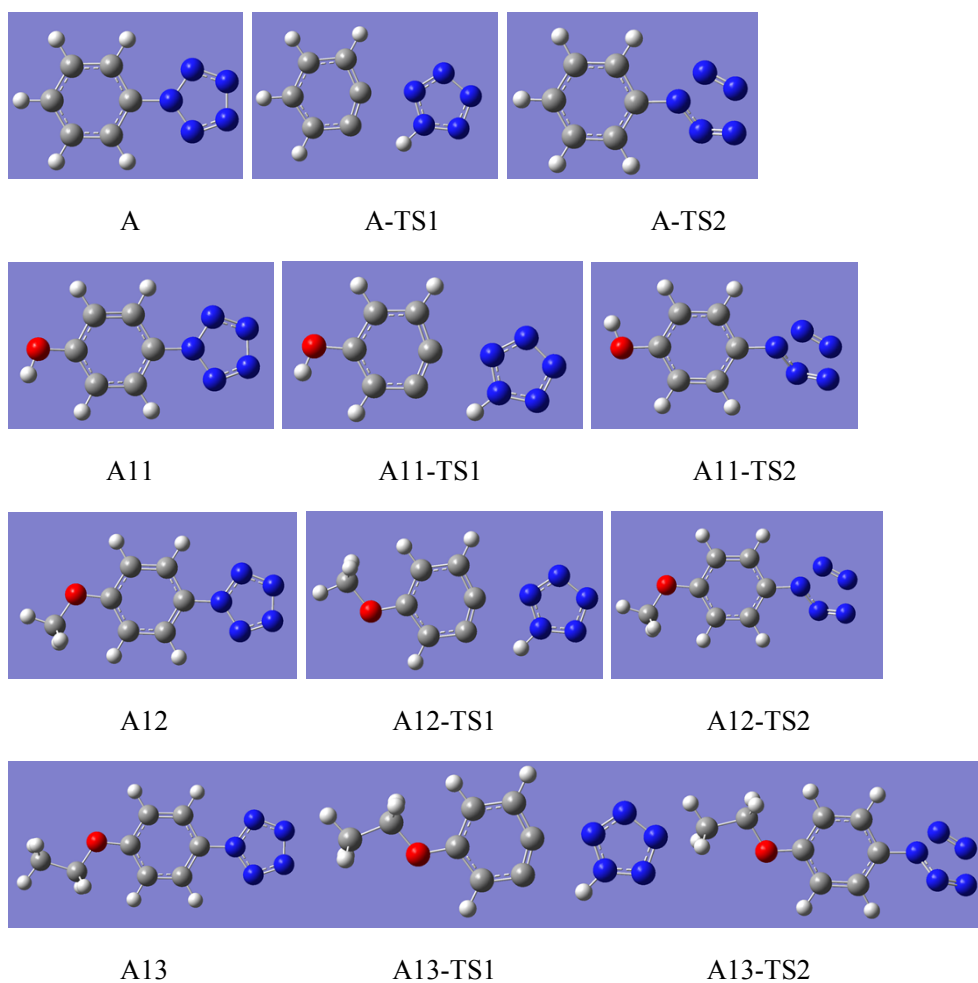

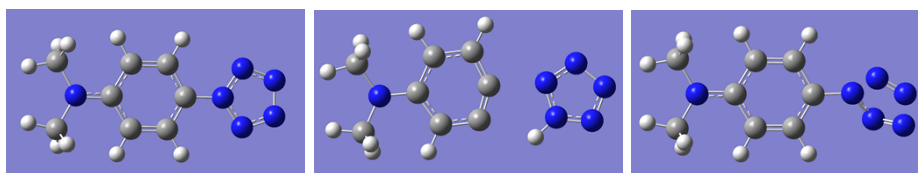

A14

A14-TS1

A14-TS2

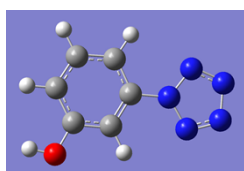

A15

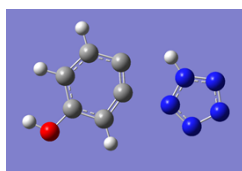

A15-TS1

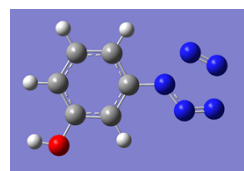

A15-TS2

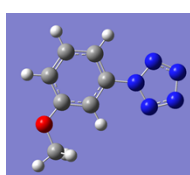

A16

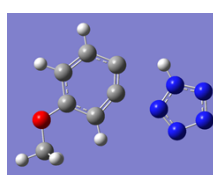

A16-TS1

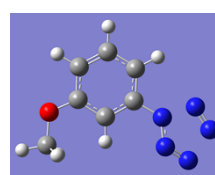

A16-TS2

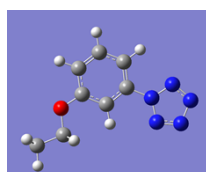

A17

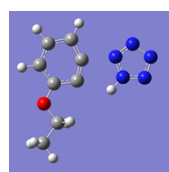

A17-TS1

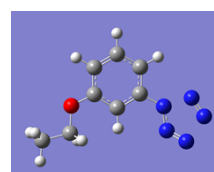

A17-TS2

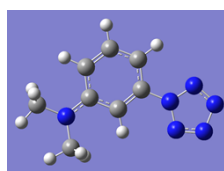

A18

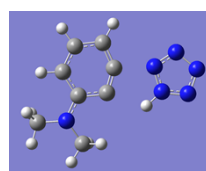

A18-TS1

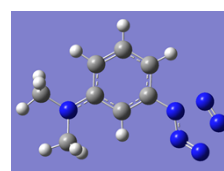

A18-TS2

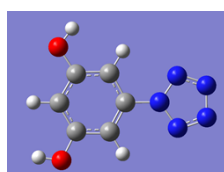

A21

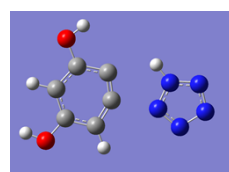

A21-TS1

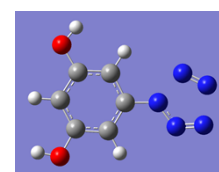

A21-TS2

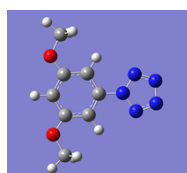

A22

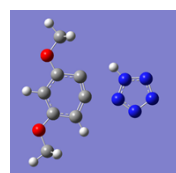

A22-TS1

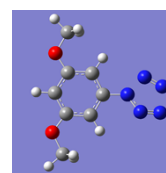

A22-TS2

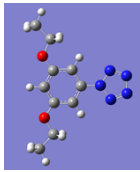

A23

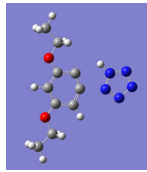

A23-TS1

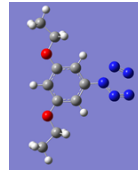

A23-TS2

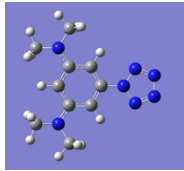

A24

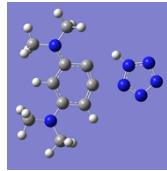

A24-TS1

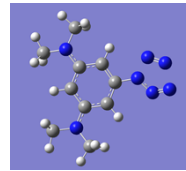

A24-TS2

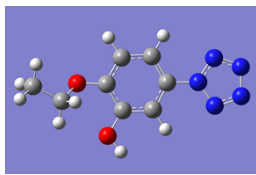

A25

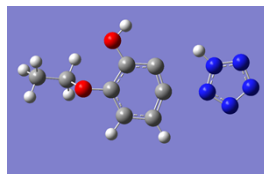

A25-TS1

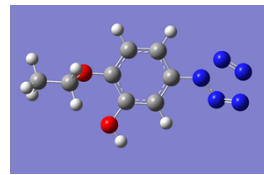

A25-TS2

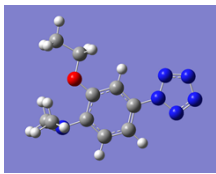

A26

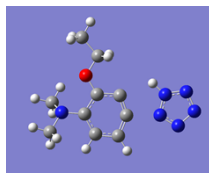

A26-TS1

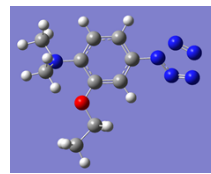

A26-TS2

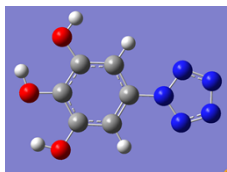

A31

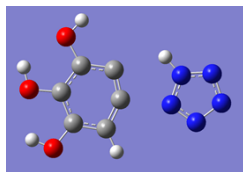

A31-TS1

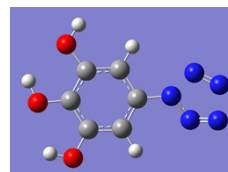

A31-TS2

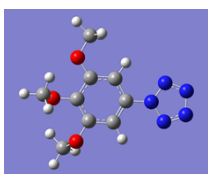

A32

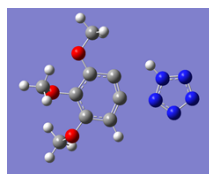

A32-TS1

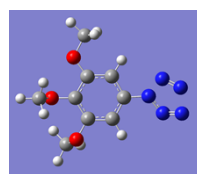

A32-TS2

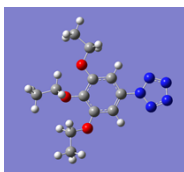

A33

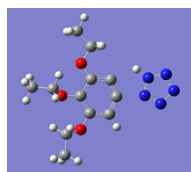

A33-TS1

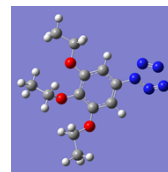

A33-TS2

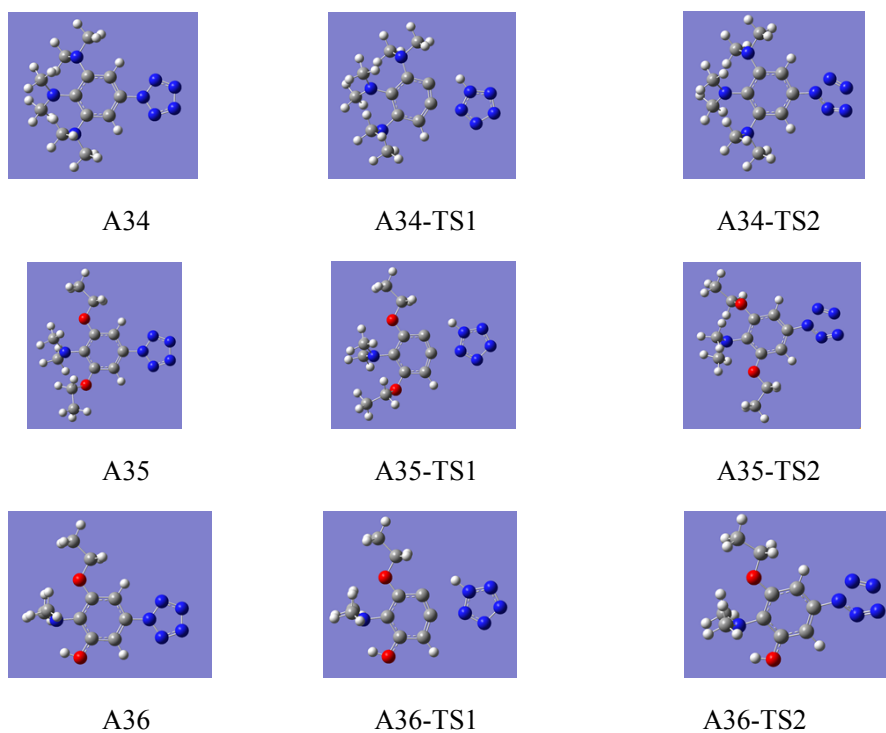

Figure 1S Structures of A, derivatives and TS1s and TS2s

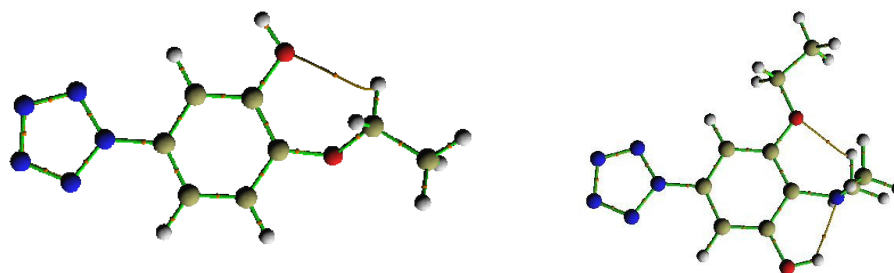

Figure 2S structures of A25 and A36 with hydrogen bond paths
